# Supplementary material for: Theranostic Small-Molecule Prodrug Conjugates for Targeted Delivery and Controlled Release of Toll-like Receptor 7 Agonists
Source: MDPI journal article supplement (doi:10.3390/ijms23137160), 2022-06-28
Supplement: s1 [file s1]

## Supplementary Materials

# Theranostic Small-Molecule Prodrug Conjugates for Targeted Delivery and Controlled Release of Toll-like Receptor 7 Agonists

Sashi Debnath<sup>1</sup>, Guiyang Hao<sup>1</sup>, Bing Guan<sup>1</sup>, Pawan Thapa<sup>1</sup>, Justin Hao<sup>1,2</sup>, Hans Hammers<sup>\*3,4</sup> and Xiankai Sun<sup>\*1,4,5</sup>

<sup>1</sup> Department of Radiology, University of Texas Southwestern Medical Center, Dallas, TX 75390, USA;

sashi.debnath@utsouthwestern.edu (S.D.); guanbing27@163.com (B.G.); guiyang.hao@utsouthwestern.edu (G.H.);

<sup>2</sup> Texas Academy of Mathematics and Science, University of North Texas, Denton, TX 76203, USA; justinhao@my.unt.edu

<sup>3</sup> Department of Internal Medicine; University of Texas Southwestern Medical Center, Dallas, TX 75390, USA

<sup>4</sup> Kidney Cancer Program; University of Texas Southwestern Medical Center, Dallas, TX 75390, USA

<sup>5</sup> Advanced Imaging Research Center; University of Texas Southwestern Medical Center, Dallas, TX 75390, USA

\* Correspondence: hans.hammers@utsouthwestern.edu (H.H.); xiankai.sun@utsouthwestern.edu (X.S.)

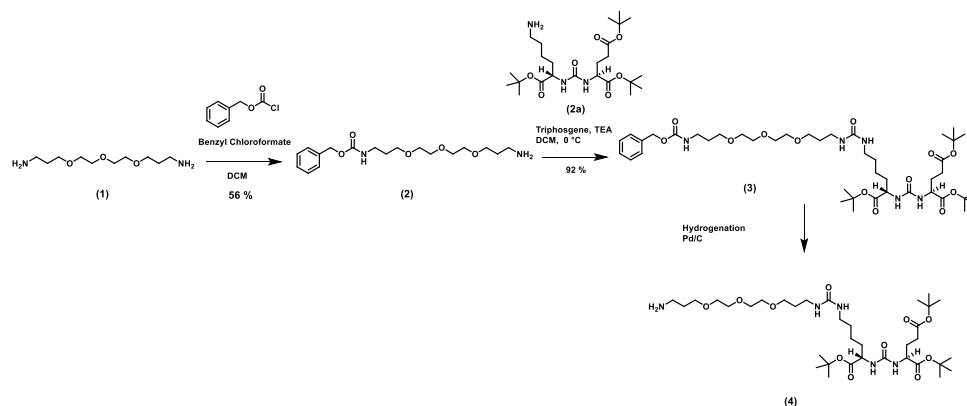

**Scheme S1.** Synthesis of compound NH<sub>2</sub>-PEG<sub>3</sub>-Lys-Urea-Glu (t-butyl protected) (4).

### Synthesis of compound S2

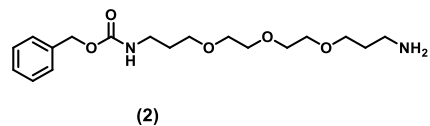

4,7,10-Trioxa-1,13-tridecanediamin (10.52 mL, 48 mmol) was diluted in 150 mL CH<sub>2</sub>Cl<sub>2</sub> under nitrogen at 0 °C. Then the mixture was stirred at 0 °C for 20 minutes, followed by the addition of benzoyl chloroformate (853  $\mu$ L, 6 mmol) solution in 20 ml THF. Stirring was continued at room temperature for 16 h. CH<sub>2</sub>Cl<sub>2</sub> layer was extracted from water and concentrated in a rotary evaporator. Pure compound was isolated as a colorless syrup from silica gel column chromatography, 20 % methanol in CH<sub>2</sub>Cl<sub>2</sub> solvent mixture (1.2 g, 56%). <sup>1</sup>H NMR (400 MHz, CDCl<sub>3</sub>):  $\delta$  7.32 (m, 5H), 5.61 (s, 2H), 5.07 (s, 2H), 3.57-3.52 (m, 10H), 3.29 (s, 2H), 2.78 (s, 2H), 2.42 (s, 2H), 1.76-1.68 (m, 4H). Figure S1.

### Synthesis of compound S3

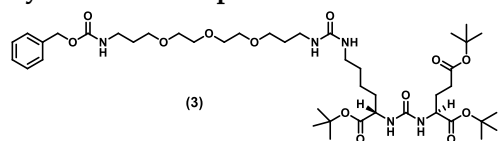

Compound **2** (198 mg, 0.56 mmol) and triphosgene (70 mg, 0.23 mmol) were diluted in CH<sub>2</sub>Cl<sub>2</sub> (25 mL) at 0 °C under nitrogen and then Et<sub>3</sub>N (150 mg, 1.5 mmol) was added. The mixture was stirred at 0 °C for 2 h to allow isocyanate formation, followed by the addition of compound **2a** (300 mg, 0.61 mmol) in Et<sub>3</sub>N (80 mg, 0.8 mmol) and CH<sub>2</sub>Cl<sub>2</sub> (3 mL). Stirring was continued at room temperature for 16 h, and then the reaction was quenched with 1 M HCl (30 mL). The organic layer was concentrated into a yellow syrup, which was purified by flash column chromatography, eluting with a 5 % MeOH in CH<sub>2</sub>Cl<sub>2</sub> solvent mixture to provide compound **3** as a clear colorless syrup (450 mg, 92%). MS (ESI) *m/z* calcd for C<sub>43</sub>H<sub>73</sub>N<sub>5</sub>O<sub>13</sub>: 867.52; found: 868.54 ([M + H]<sup>+</sup>, Figure S2).

### Synthesis of NH<sub>2</sub>-PEG<sub>3</sub>-Lys-Urea-Glu (t-butyl protected), **4**

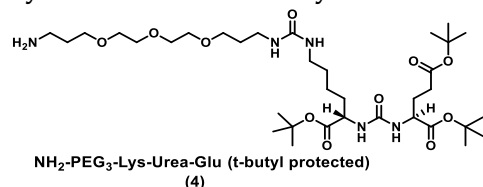

Compound **3** (0.26 g, 0.3 mmol) was diluted in EtOAc (15 mL) and degassed for 5 min with nitrogen, followed by the addition of 10% Pd on activated charcoal (30 mg), and the mixture was degassed for another 5 min. The mixture was hydrogenated at room temperature with a hydrogen balloon for 36 h and was then filtered and washed with EtOAc through a Celite pad. The solution was concentrated to provide a syrup which was purified by flash column chromatography, eluting with a 10% gradient of MeOH in CH<sub>2</sub>Cl<sub>2</sub>, to give the compound **4** as a clear colorless syrup (0.19 g, 86%). MS (ESI) *m/z* calcd for C<sub>35</sub>H<sub>67</sub>N<sub>5</sub>O<sub>11</sub>: 733.48; found: 734.51 ([M + H]<sup>+</sup>, Figure S3, SI). <sup>1</sup>H NMR (400 MHz, CDCl<sub>3</sub>): δ 8.02-7.77 (m, 4H), 4.31-4.18 (m, 2H), 3.77-3.45 (m, 14H), 3.29-3.10 (m, 6H), 2.39-2.28 (m, 2H), 2.12-1.93 (m, 4H), 1.85-1.66 (m, 4H), 1.58-1.33 (m, 27H), 1.31-1.22 (m, 2H), Figure S4.

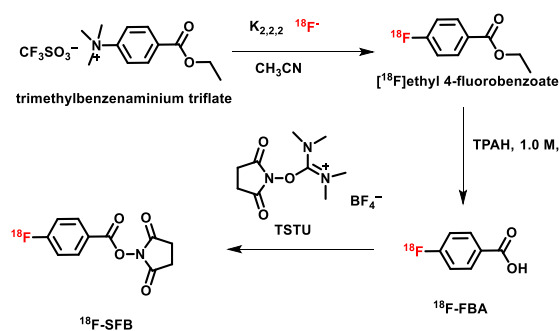

**Scheme S2.** Synthesis of [<sup>18</sup>F]N-Succinimidyl 4-fluorobenzoate, [<sup>18</sup>F]SFB.

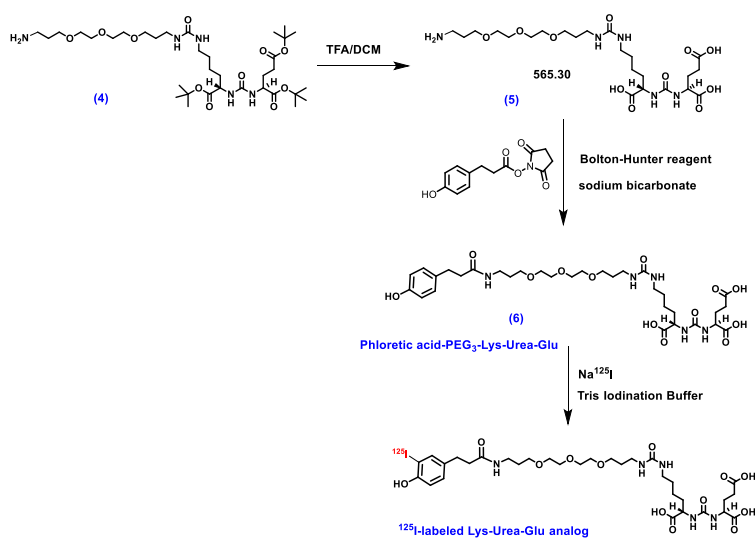

**Scheme S3.** Synthesis of  $^{125}\text{I}$ -labeled Lys-Urea-Glu analog.

#### Synthesis of compound S5

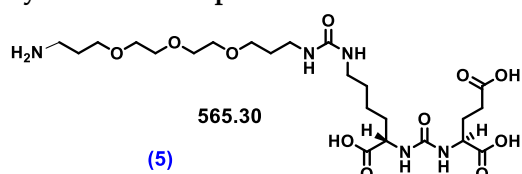

Compound 4 (73 mg, 0.1 mmol) was dissolved in DCM (2 mL), and trifluoroacetic acid (2.0 mL) was added to this solution under nitrogen ( $\text{N}_2$ ). The reaction mixture was then stirred for 6 h, and product formation was monitored via ESI-MS. The reaction solvent was evaporated under reduced pressure in a rotary evaporator to afford a crude product which was then purified by a reversed phase HPLC (10% Acetonitrile/90%  $\text{H}_2\text{O}$  to 40% Acetonitrile/60%  $\text{H}_2\text{O}$  over 14 min, all solvent contained 0.1% TFA). Pure fractions from HPLC were combined from multiple single injections and lyophilized to produce compound 5 as a sticky liquid (39 mg, 70%). MS (ESI)  $m/z$  calcd for  $\text{C}_{23}\text{H}_{43}\text{N}_5\text{O}_{11}$ : 565.30; found: 566.37 ( $[\text{M} + \text{H}]^+$ , Figure S5).

#### Synthesis of Phloretic acid-PEG<sub>3</sub>-Lys-Urea-Glu, S6

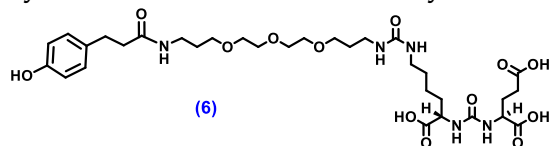

Compound 5 (29 mg, 0.05 mmol) was diluted in a 1:1 mixture of acetone and water (2 mL) under nitrogen, and Bolton-Hunter reagent precursor (16 mg, 0.06 mmol) was added to this solution. Then the mixture was stirred at room temperature for 5 minutes, followed by the addition of  $\text{NaHCO}_3$  (16.8 mg, 0.20 mmol). Stirring was continued for 12 h at room temperature. The crude reaction mixture was then purified by a reversed phase HPLC (10% Acetonitrile/90%  $\text{H}_2\text{O}$  to 60% Acetonitrile/40%  $\text{H}_2\text{O}$  over 15 min; all solvents contained 0.1% TFA). Pure fractions from HPLC were combined together from multiple single injections and lyophilized to produce compound 6 as a white solid (22 mg, 61%). MS (ESI)  $m/z$  calcd for  $\text{C}_{32}\text{H}_{51}\text{N}_5\text{O}_{13}$ : 713.35; found: 714.42 ( $[\text{M} + \text{H}]^+$ , Figure S6, SI).  $^1\text{H}$  NMR (400 MHz,  $\text{D}_2\text{O}$ ):  $\delta$  7.14 (d,  $J=8.52$ , 2H), 6.85 (d,  $J=8.52$ ,

2H), 4.30-4.13 (m, 2H), 3.70-3.47 (m, 10H), 3.24-3.04 (m, 8H), 2.90-2.80 (m, 2H), 2.55-2.45 (m, 4H), 2.23-2.11 (m, 1H), 2.04-1.90 (m, 1H), 1.87-1.64 (m, 4H), 1.61-1.32 (m, 6H), Figure S7, SI.  $^{13}\text{C}$  NMR (100 MHz,  $\text{D}_2\text{O}$ ):  $\delta$  177.22, 175.51, 160.53, 159.23, 155.00, 153.78, 151.10, 132.12, 129.75, 115.27, 69.49, 69.44, 69.24, 69.21, 68.44, 67.95, 53.22, 52.62, 39.48, 37.59, 36.91, 35.90, 30.61, 30.48, 30.01, 29.01, 28.62, 28.01, 26.25, 22.18, Figure S8.

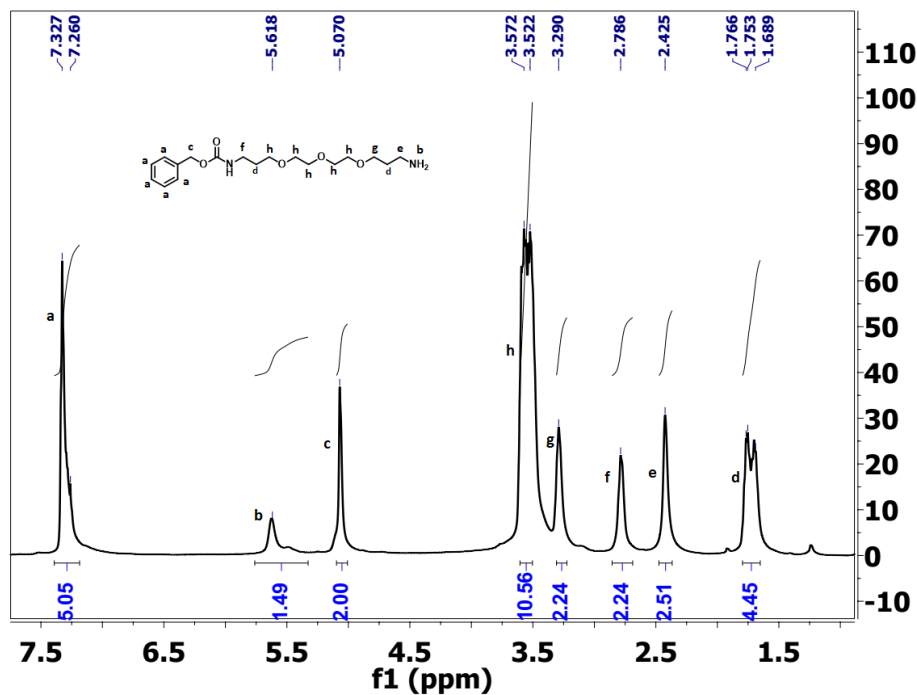

Figure S1  $^1\text{H}$  NMR of compound 2.

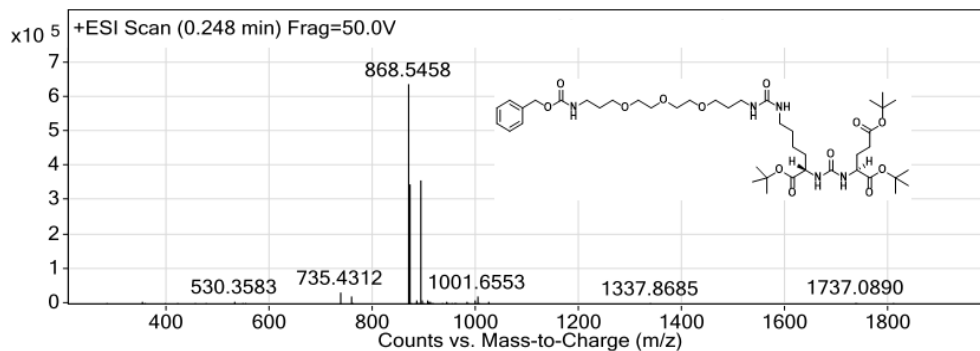

Figure S2 MS (ESI) of compound 3.

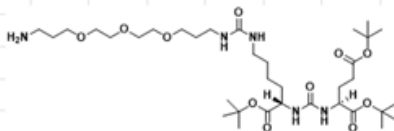

**Figure S4**  $^1\text{H}$  NMR of compound **4**.

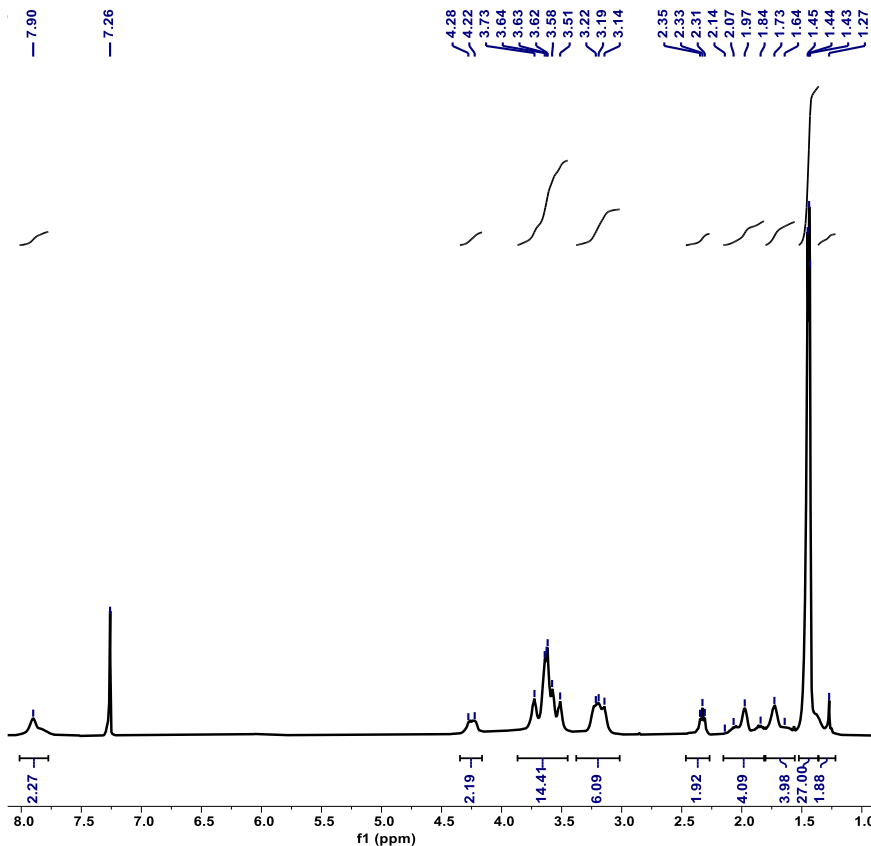



Figure S7  $^1\text{H}$  NMR of compound 6.

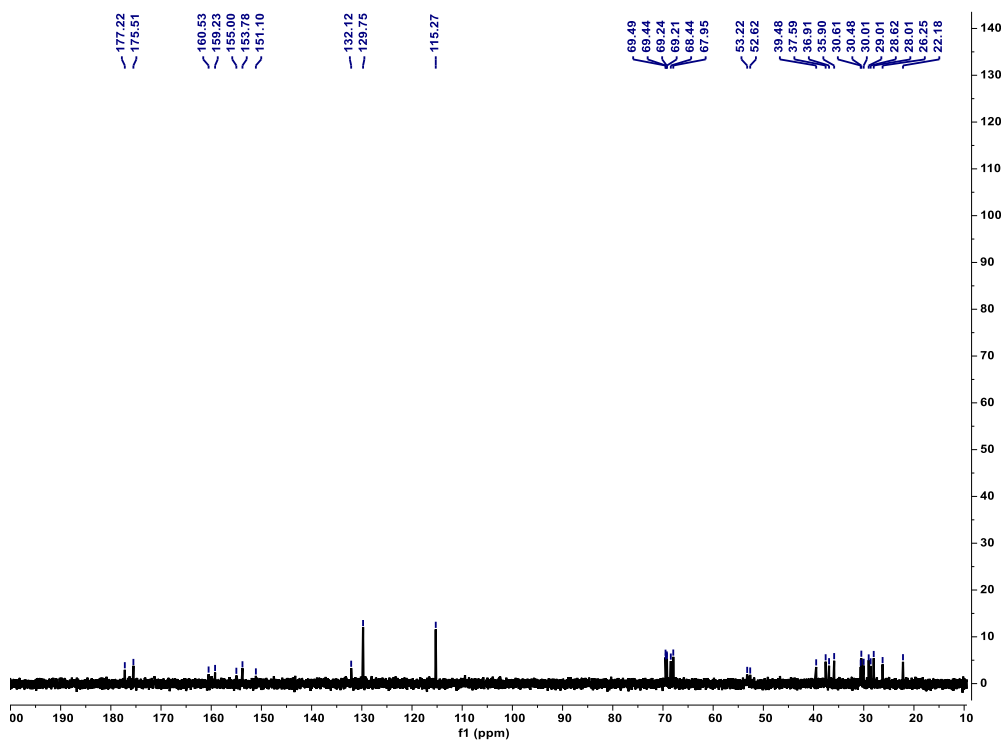

Figure S8  $^{13}\text{C}$  NMR of compound 6.

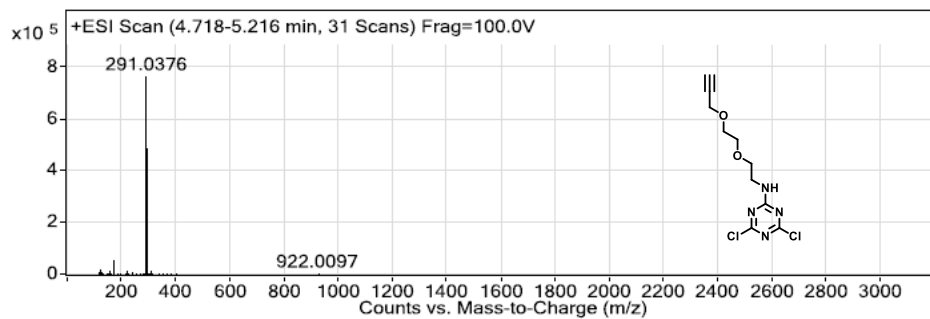

Figure S9 MS (ESI) of compound TZ-PEG<sub>2</sub>-PROP.

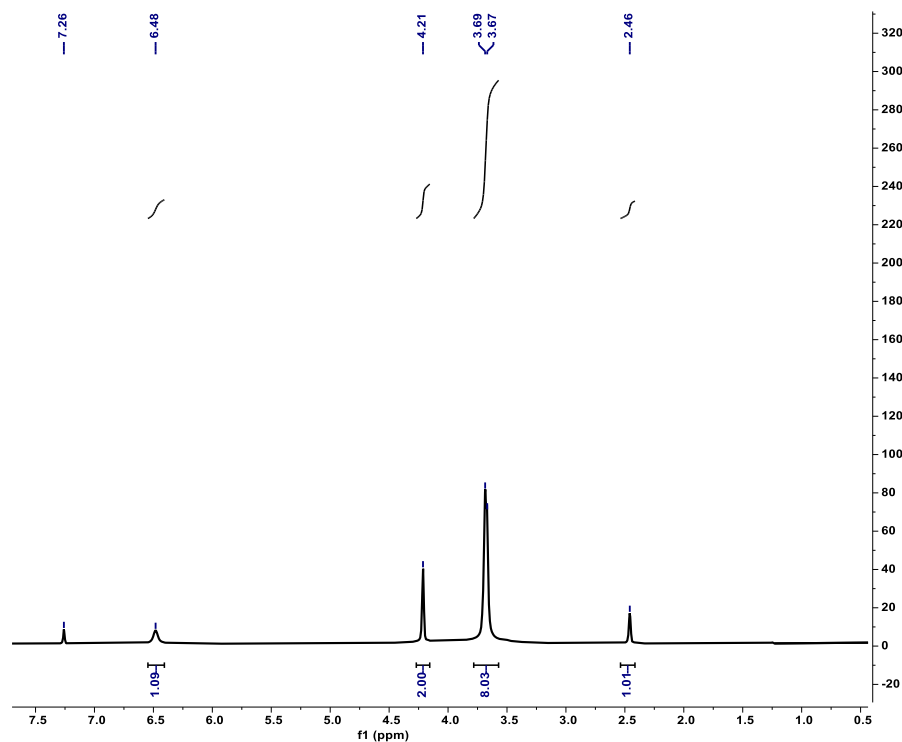

Figure S10 <sup>1</sup>H NMR of compound TZ-PEG<sub>2</sub>-PROP.

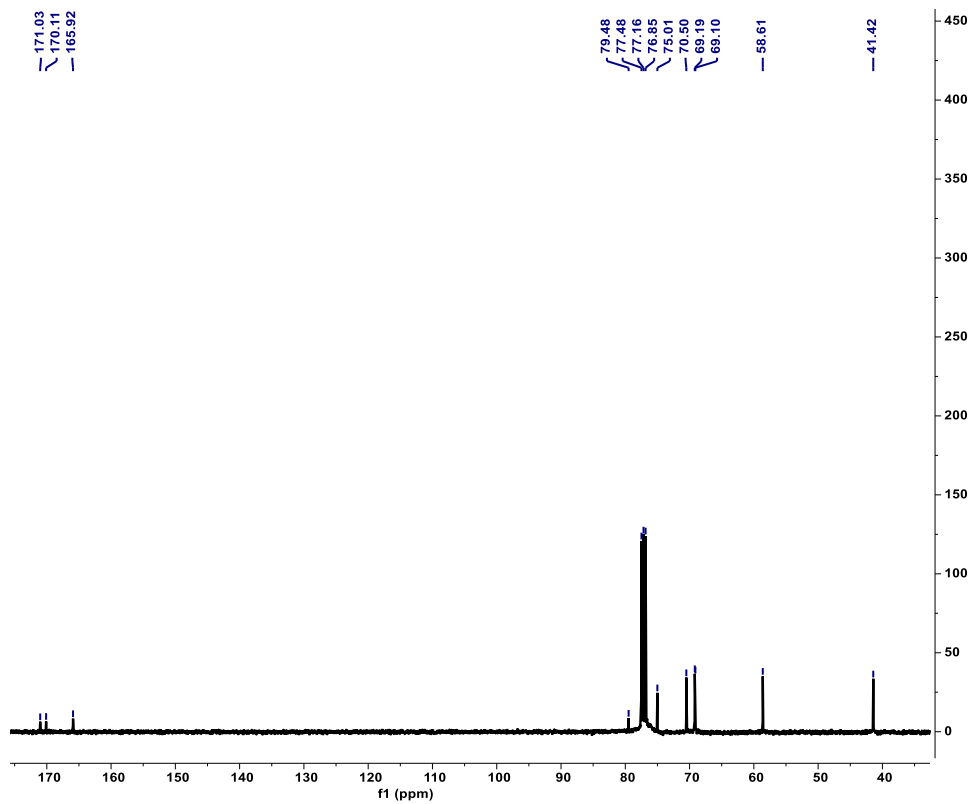

Figure S11 <sup>13</sup>C NMR of compound TZ-PEG<sub>2</sub>-PROP.



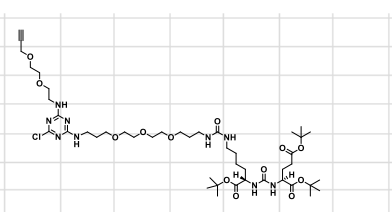

**Figure S12** MS (ESI) of compound TZ(PEG<sub>3</sub>-Lys-Urea-Glu)-PEG<sub>2</sub>-PROP (t-butyl protected).

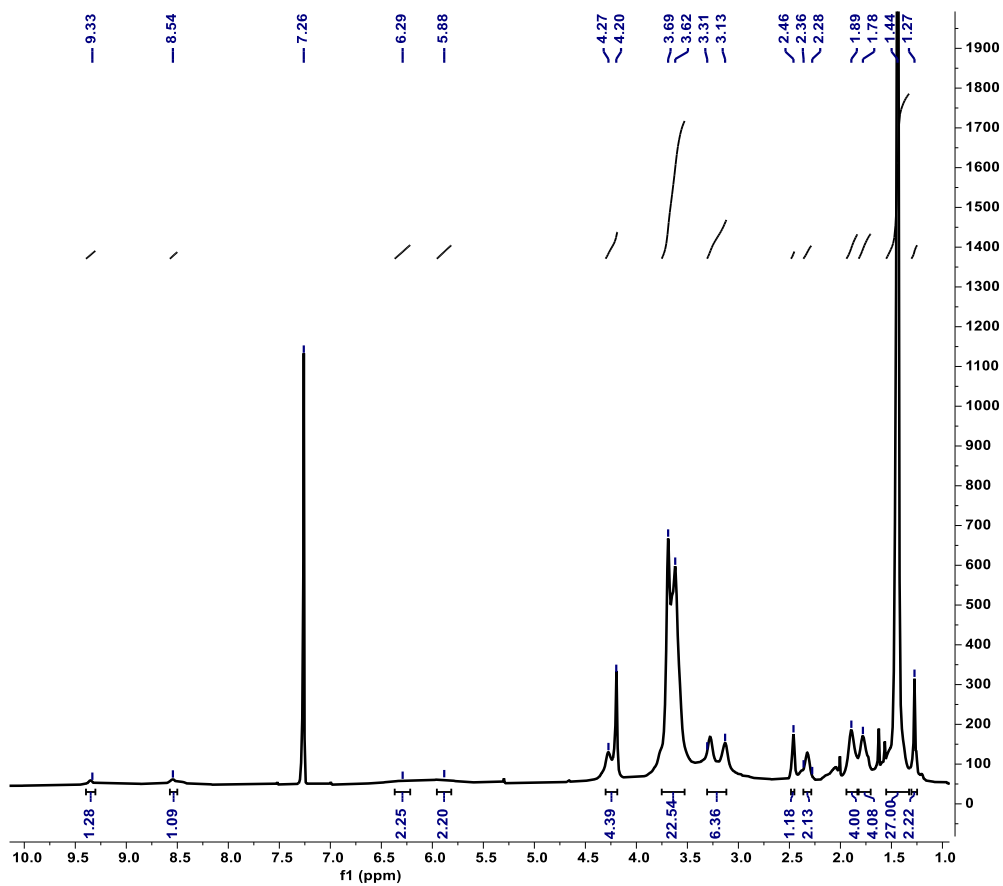

**Figure S13**  $^1\text{H}$  NMR of compound TZ(PEG<sub>3</sub>-Lys-Urea-Glu)-PEG<sub>2</sub>-PROP (t-butyl protected).

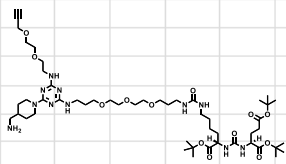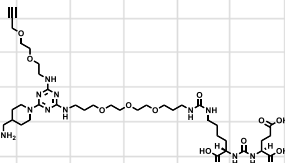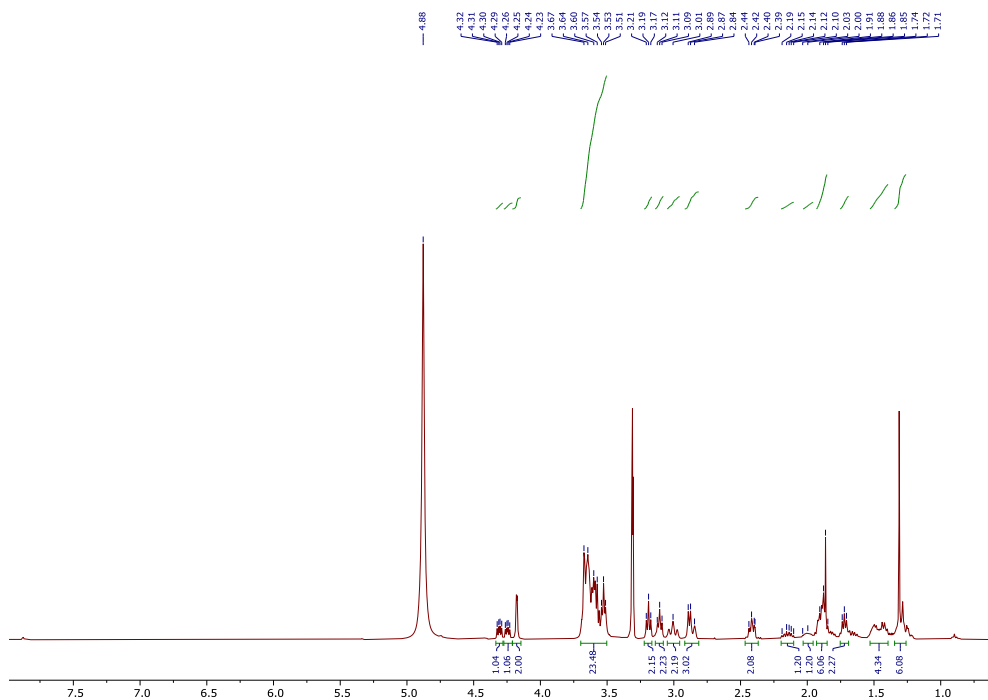

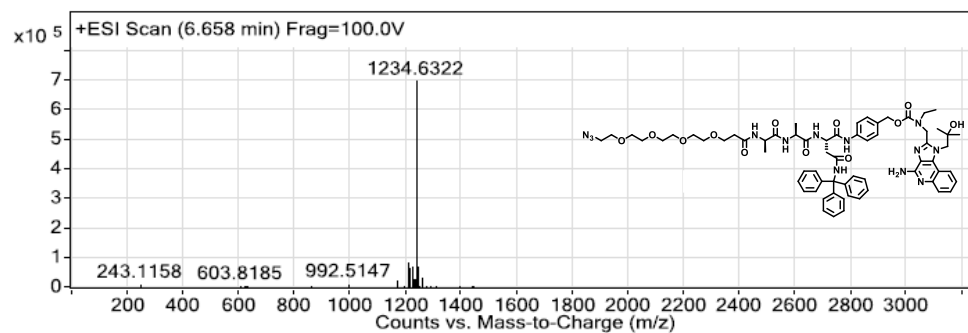

Figure S17 MS (ESI) of compound Azido-PEG<sub>4</sub>-LEGU-GARD.

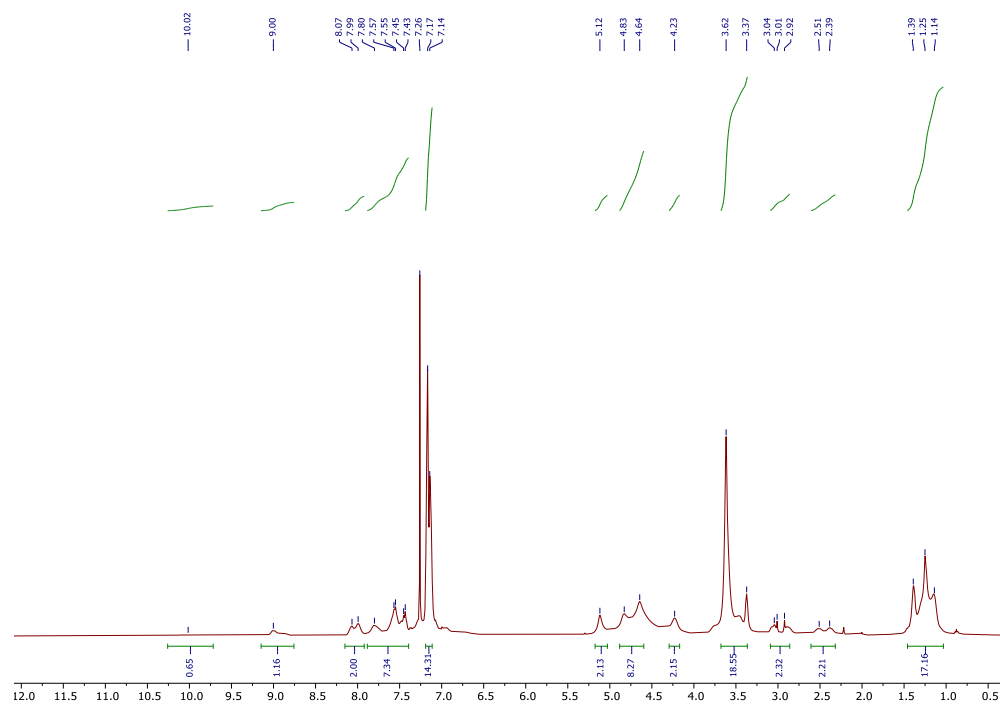

Figure S18 <sup>1</sup>H NMR of compound Azido-PEG<sub>4</sub>-LEGU-GARD.

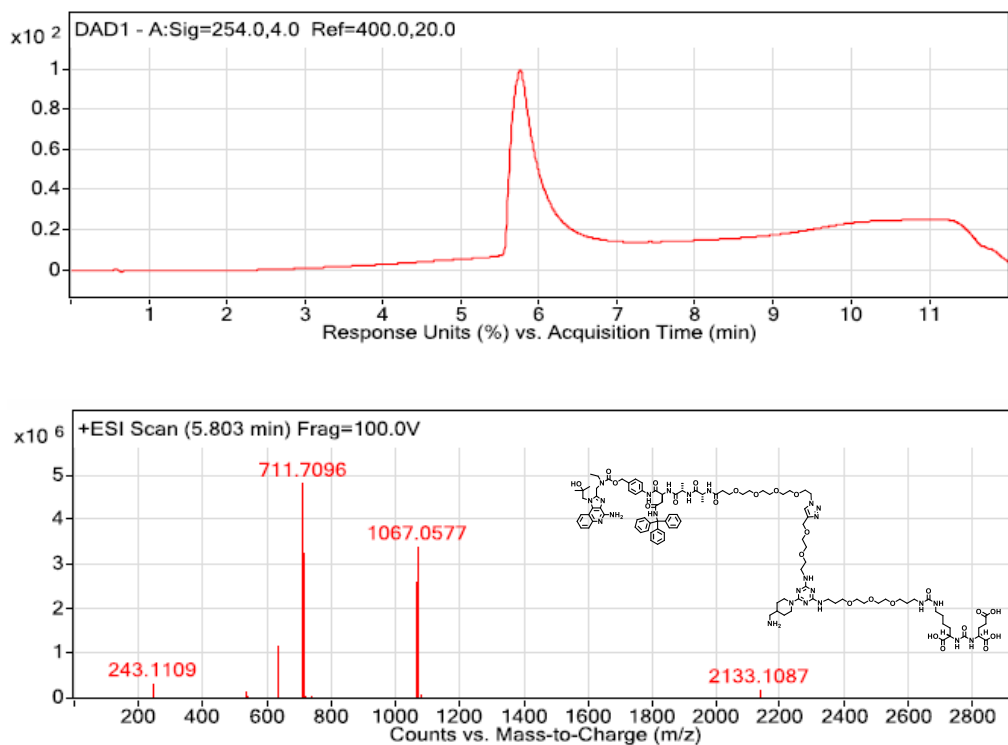

**Figure S19** MS (ESI) of compound AMP-TZ(Lys-Urea-Glu)-PEG<sub>6</sub>-LEGU-GARD.

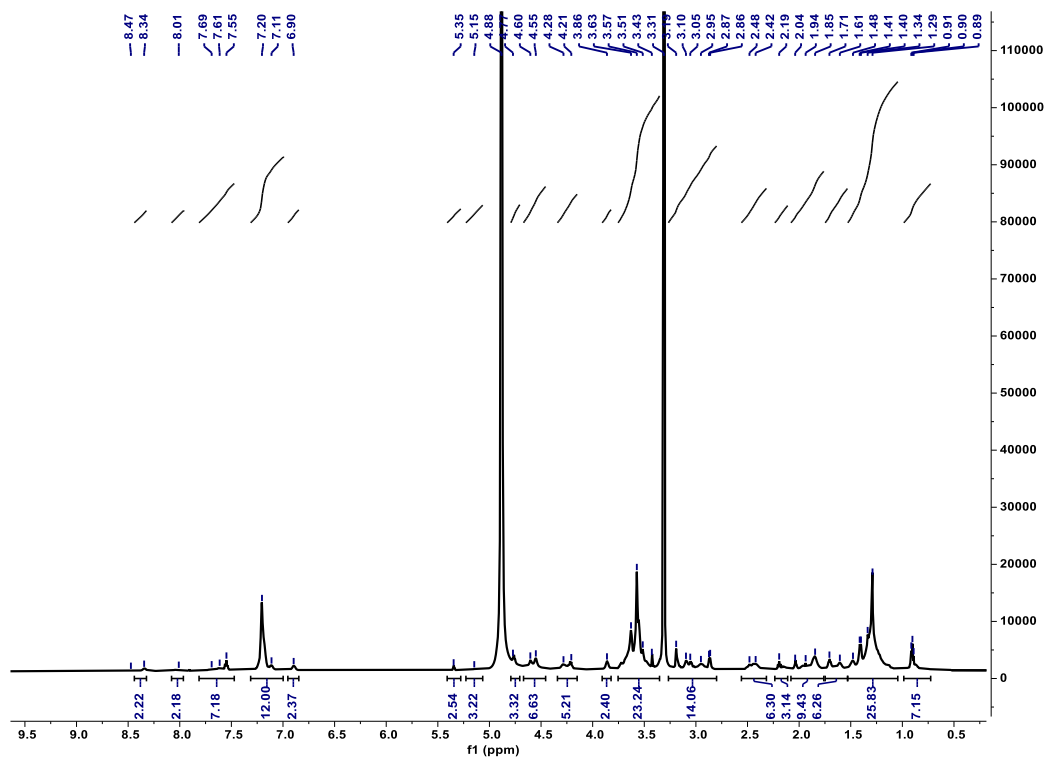

**Figure S20** <sup>1</sup>H NMR of compound AMP-TZ(Lys-Urea-Glu)-PEG<sub>6</sub>-LEGU-GARD

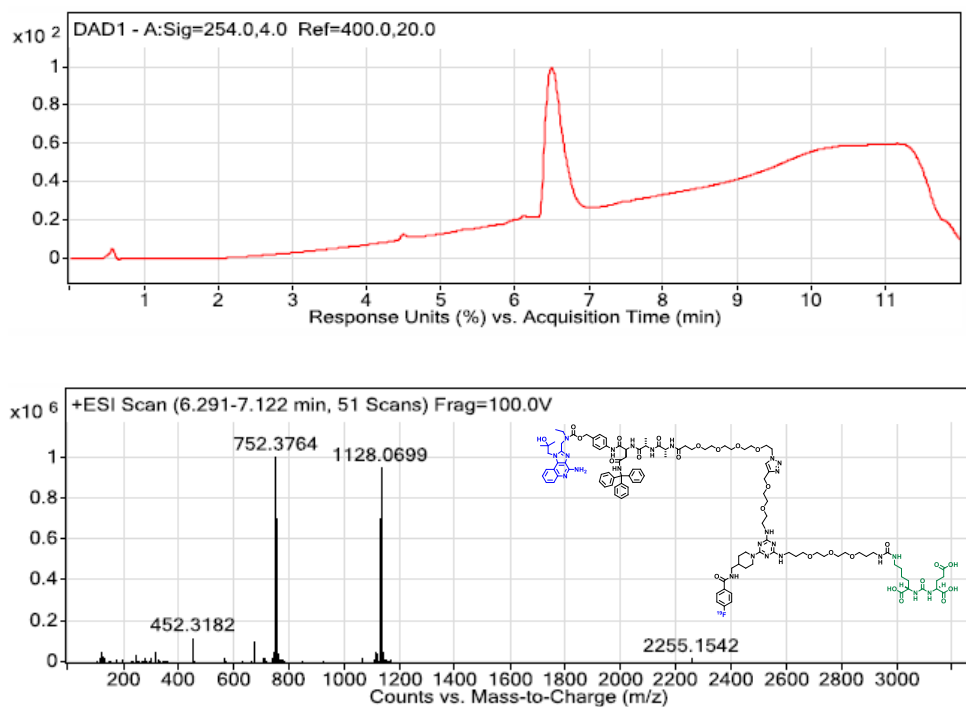

**Figure S21** MS (ESI) of compound [19F]F-TZ(PSMA)-LEGU-TLR7.

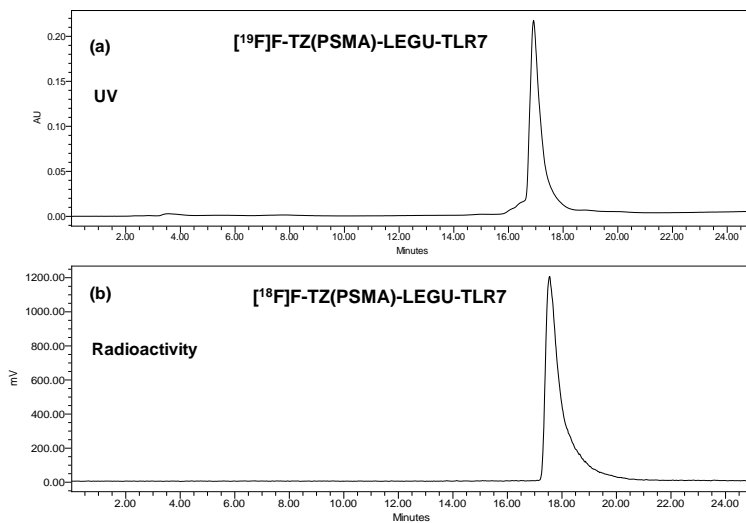

**Figure S22.** Chemical identity of radiolabeled product [18F]F-TZ(PSMA)-LEGU-TLR7 with standard [19F]F-TZ(PSMA)-LEGU-TLR7. HPLC chromatograms of [19F]F-TZ(PSMA)-LEGU-TLR7 (a) and [18F]F-TZ(PSMA)-LEGU-TLR7 (b).

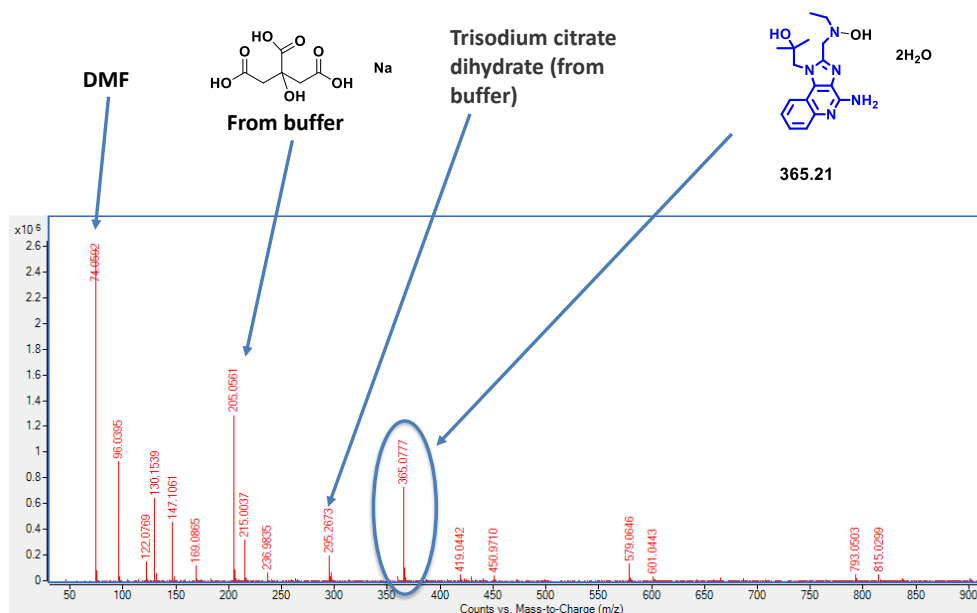

**Figure S23.** MS (ESI) of legumain treated conjugate [ $^{19}\text{F}$ ]F-TZ(PSMA)-LEGU-TLR7.

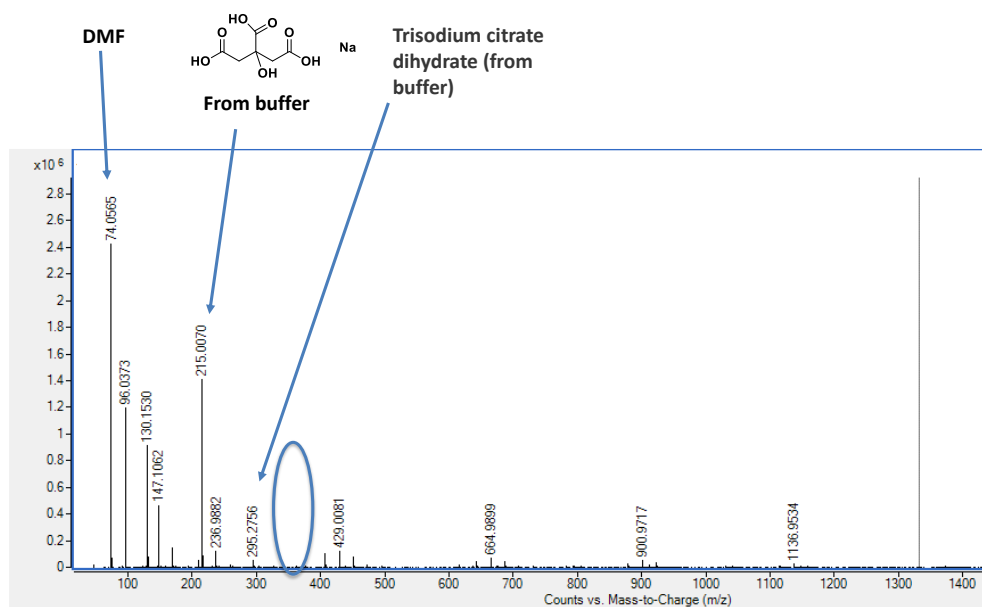

**Figure S24.** MS (ESI) of legumain untreated conjugate [ $^{19}\text{F}$ ]F-TZ(PSMA)-LEGU-TLR7.
